# Supplementary material for: The role of ultraviolet reflectance and pattern in the pollination system of Hypoxis camerooniana (Hypoxidaceae)
Source: PubMed Central journal article supplement (PMC6803167; doi:10.1093/aobpla/plz057), 2019-09-23
Supplement: plz057_suppl_supplementary_material.pdf [file plz057_suppl_supplementary_material.pdf]

1 **Supplementary material**

2 Article title: The role of ultraviolet reflectance and pattern in the pollination system of *Hypoxis*  
3 *camerooniana* (Hypoxidaceae).

4

5 The following supplementary material is available for this article:

6 **Fig. S1:** Frequency of nocturnal visits of *Hypoxis camerooniana* flowers.

7 **Fig. S2:** Diurnal changes in bee visitation frequencies on flowers of *Hypoxis camerooniana* after  
8 manipulation of their UV reflectance. Means (bars) and SE (whiskers) are shown.

9 **Fig. S3:** Diurnal changes in fly visitation frequencies on flowers of *Hypoxis camerooniana* after  
10 manipulation of their UV reflectance. Means (bars) and SE (whiskers) are shown.

11 **Fig. S4:** Bee (A) and fly (B) behaviour on flowers of *Hypoxis camerooniana* after manipulation of their  
12 UV reflectance. There was no significant effect of treatment on both bee ( $F_{ps}=0.49$ ;  $df=4$ ;  $P_{perm}=0.770$ )  
13 and fly ( $F_{ps}=0.44$ ;  $df=4$ ;  $P_{perm}=0.903$ ) behaviour after landing.

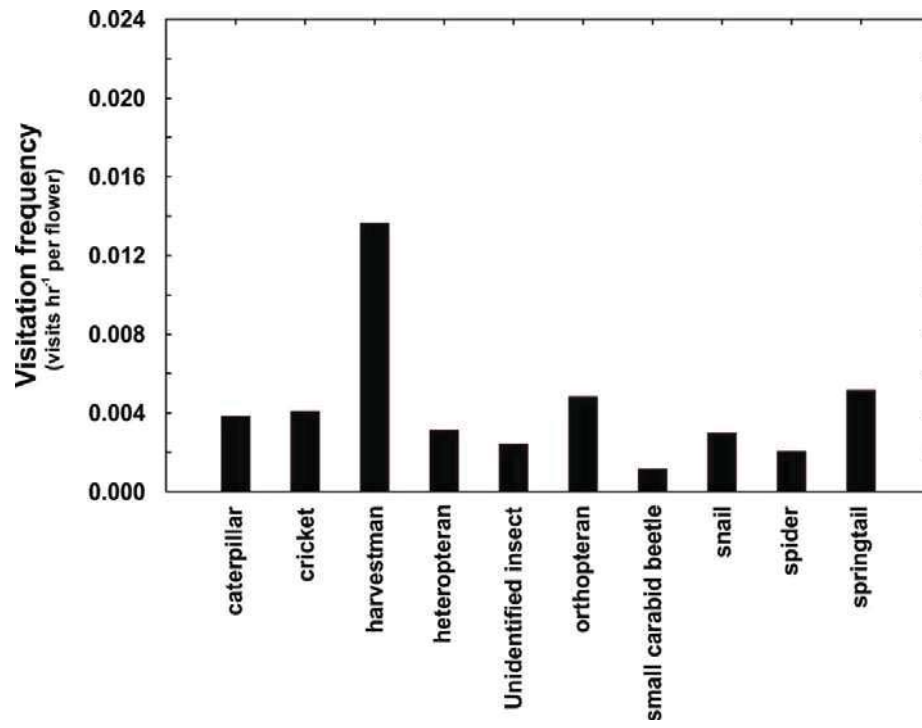

1

2 **Fig. S1:** Frequency of nocturnal visits of *Hypoxis camerooniana* flowers.

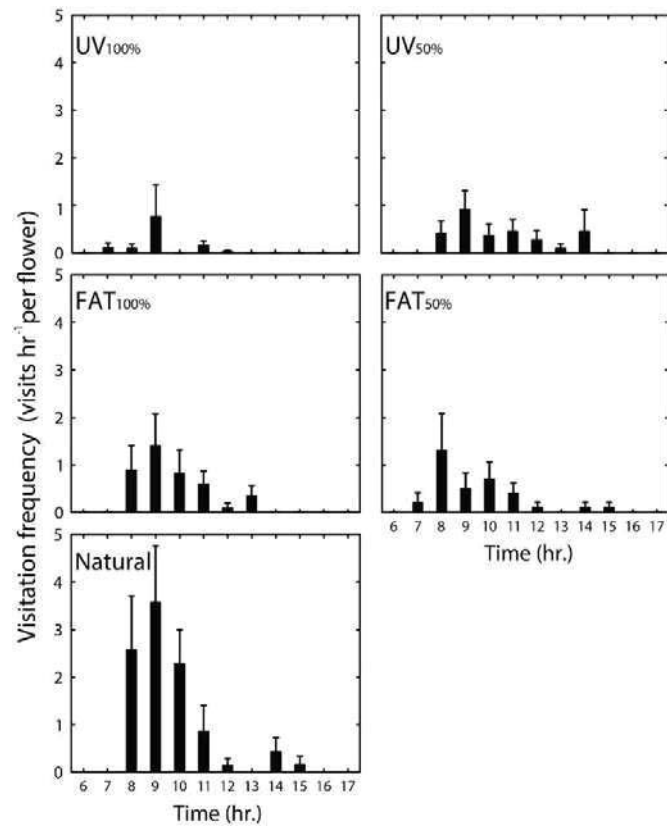

1

2 **Fig. S2:** Diurnal changes in bee visitation frequencies on flowers of *Hypoxis camerooniana* after

3 manipulation of their UV reflectance. Means (bars) and SE (whiskers) are shown.

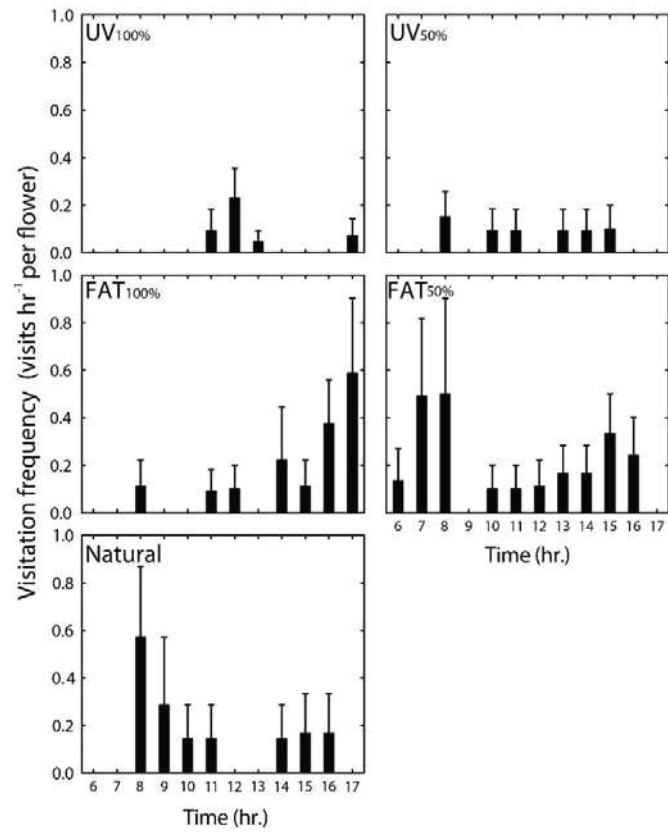

1

2 **Fig. S3:** Diurnal changes in fly visitation frequencies on flowers of *Hypoxis camerooniana* after  
 3 manipulation of their UV reflectance. Means (bars) and SE (whiskers) are shown.

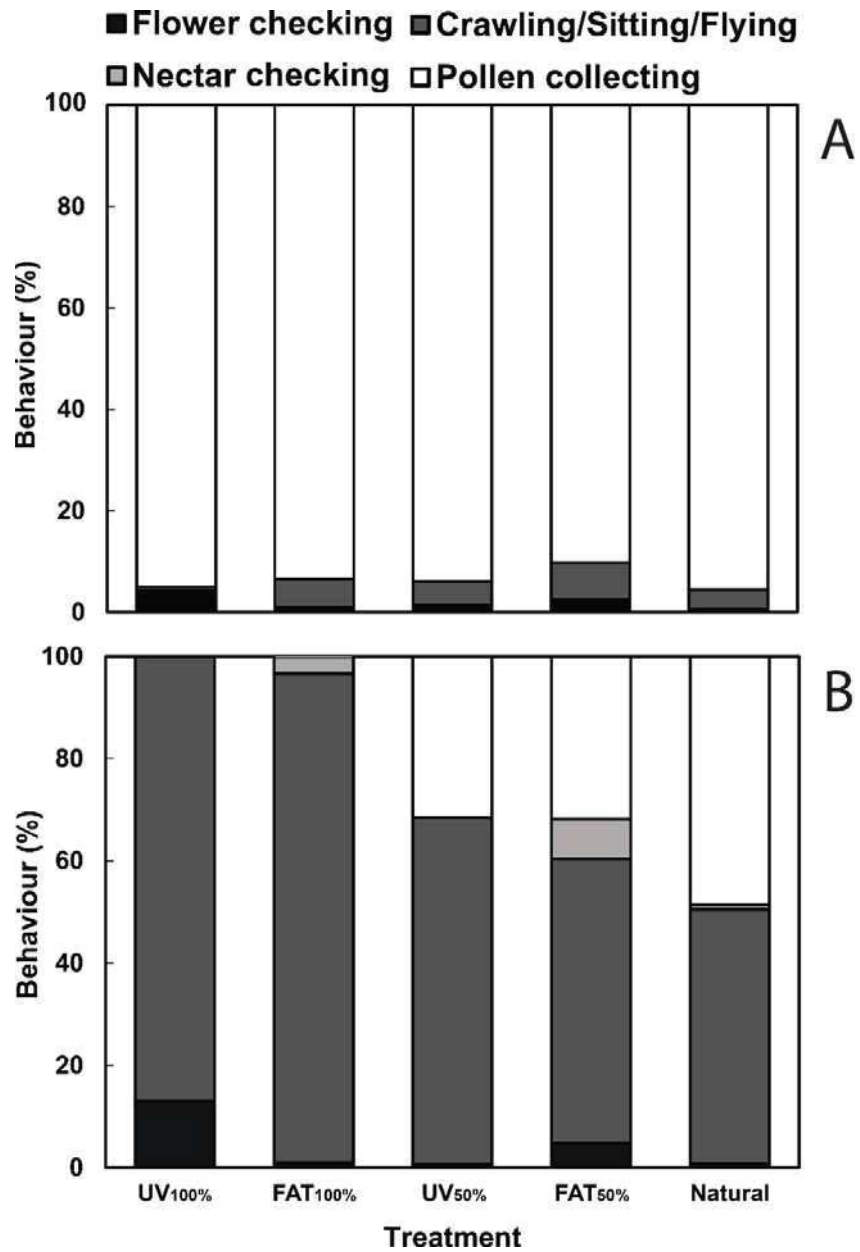

1

2 **Fig. S4:** Bee (A) and fly (B) behaviour on flowers of *Hypoxis camerooniana* after manipulation of their

3 UV reflectance. There was no significant effect of treatment on both bee ( $F_{ps}=0.49$ ;  $df=4$ ;  $P_{perm}=0.770$ )

4 and fly ( $F_{ps}=0.44$ ;  $df=4$ ;  $P_{perm}=0.903$ ) behaviour after landing.
